# Supplementary material for: On the Highly Ordered Graphene Structure of Non-Graphitic Carbons (NGCs)—A Wide-Angle Neutron Scattering (WANS) Study
Source: MDPI journal article supplement (doi:10.3390/c9010027), 2023-02-27
Supplement: s1 [file s1]

Archive with 1 entries (1 files):
- carbon-2148948-supplementary.pdf
